# Supplementary material for: Extensive intraspecies cryptic variation in an ancient embryonic gene regulatory network
Source: eLife. 2019 Aug 15;8:e48220. doi: 10.7554/eLife.48220 (PMC6754231; doi:10.7554/eLife.48220)
Supplement: Supplementary file 1. [file elife-48220-supp1.xlsx]

## Sheet: Supplmentary File 1
Strain	skn-1(RNAi) phenotype (%)	mom-2(RNAi) phenotype (%)	latitude	longitude	City/Nation/State	Location	Presence of zeel-1/peel-1 deletion (0=N2-like; 1=CB4856-like	Presence of Cer1 insertion into plg-1 (0=N2-like; 1=CB4856-like)	ppw-1 deletion; frameshift variant on I:4,187,629(0=N2-like; 1=CB4856-like)	Isolation Date	Sampled by
AB1	15.81	79.8407	-34.93	138.59	Adelaide, Australia		0	0	0	1983	D. Riddle and A. Bird
AB4	43	94.6699	-34.93	138.59	Adelaide, Australia		1	1	0	1983	D. Riddle and A. Bird
CB4851	1.3	73.6985	44.85	0.48	Bergerac, France		0	0	0	pre-1949	V. Nigon
CB4852	55.7	87.7221	NA	NA	Unknown		0	0	0	pre-1966	Unknown
CB4853	25.84	NA	34.189	-118.131	Altadena, USA		1	1	0	1974/05	C.D. Johnson
CB4854	18.73	94.5158	34.189	-118.131	Altadena, USA		0	1	0	1974/05	C.D. Johnson
CB4857	45.89	62.4613	34.096	-117.719	Claremont, USA		0	0	0	1972/11	E.M. Hedgecock
CB4858	46.99	88.757	NA	NA	Pasadena, USA		1	1	0	1973	E.M. Hedgecock
CB4932	20.31	87.5266	51.02	-3.1	Taunton, United Kingdom		0	0	0	pre-1991	P.S. Grewal
CX11262	17.58	92.2696	34.1295	-118.11	Los Angeles, USA	Huntington Gardens	1	1	0	2003/09	A. Sivasundar
CX11264	44.55	77.8912	34.1295	-118.11	Los Angeles, USA	Huntington Gardens	1	1	0	2003/09	A. Sivasundar
CX11271	33	95.1923	34.1371	-118.125	Pasadena, USA	California Institute of Technology	1	1	0	2003/09	A. Sivasundar
CX11276	14.8	98.1273	34.2011	-118.212	Los Angeles, USA	Decanso Gardens	1	1	0	2003/09	A. Sivasundar
CX11285	44	100	34.1433	-118.055	Los Angeles, USA	Los Angeles Arboretum	1	1	0	2003/09	A. Sivasundar
CX11292	38.1	NA	34.1353	-118.306	Los Angeles, USA	Griffith Park	1	1	0	2004/02	A. Sivasundar
CX11294	NA	99.1266	34.1295	-118.11	Los Angeles, USA	Huntington Gardens	1	1	0	2003/09	A. Sivasundar
CX11307	48	97.4848	34.1295	-118.11	Los Angeles, USA	Huntington Gardens	1	1	0	2003/09	A. Sivasundar
CX11314	46.52	90.6548	34.1295	-118.11	Los Angeles, USA	Huntington Gardens	1	1	0	2003/09	A. Sivasundar
CX11315	23.35	100	34.1295	-118.11	Los Angeles, USA	Huntington Gardens	1	1	0	2003/09	A. Sivasundar
DL200	31.48	99.4253	9.03	38.74	Addis Ababa, Ethiopia		0	1	0	2007/12	D. Denver
DL226	33.38	96.3636	44.5633	-123.282	Corvallis, USA	Oregon State University	1	1	0	2007	C. Hilburn
DL238	25	92.5926	19.22	-155.82	Manuka, Hawaii		1	1	0	2008-07-15	J. Knapp
ED3005	26	88.4537	55.94	-3.36	Edinburgh, United Kingdom		1	1	0	2004-10-25	A. Cutter
ED3011	13.68	92.9388	55.92	-3.19	Edinburgh, United Kingdom		1	1	0	2004-11-26	A. Cutter
ED3012	27	84.4288	55.92	-3.19	Edinburgh, United Kingdom		0	0	0	2004-11-26	A. Cutter
ED3017	40	95.7179	55.92	-3.19	Edinburgh, United Kingdom		0	1	0	2004-12-03	A. Cutter
ED3040	9.83	85.4448	-26.1	28.01	Johannesburg, South Africa		1	1	0	2006/03	E. Dolgin
ED3046	30	91.9875	-33.22	19.19	Ceres, South Africa		0	1	0	2006/03	E. Dolgin
ED3048	32.79	98.4893	-33.22	19.19	Ceres, South Africa		1	1	0	2006/03	E. Dolgin
ED3049	27.25	92.4827	-33.22	19.19	Ceres, South Africa		0	1	0	2006/03	E. Dolgin
ED3052	33.407	67.9518	-33.22	19.19	Ceres, South Africa		1	1	0	2006/03	E. Dolgin
ED3073	34	85.3449	-1.05	36.39	Limuru, Kenya		0	1	0	2006/03	E. Dolgin
ED3077	26.48	70.9304	-1.19	36.48	Nairobi, Kenya		1	1	0	2006/03	E. Dolgin
EG4347	50.07	84.7247	44.0479	-123.071	Eugene, USA		1	0	0	2006/10	M. Ailion
EG4349	34.43	NA	40.7717	-111.873	Salt Lake City, USA		0	1	0	2006/10	M. Ailion
EG4724	44.8	82.2704	41.6288	-8.34762	Amares, Portugal		0	1	0	2007/03	M. Ailion
EG4725	17	98.7097	41.6288	-8.34762	Amares, Portugal		0	1	0	2007/03	M. Ailion
EG4946	42.84	99.4792	40.726	-111.822	Salt Lake City, USA		0	0	0	2007-09-27	G. Hollopeter
JT11398	29.9	98.7805	47.7639	-122.275	Lake Forest Park, USA		0	0	0	2003/12	J. Kemner
JU1088	30.33	81.5509	34.7613	138.015	Kakegawa, Japan		1	1	0	2007-03-14	M-A. Felix
JU1172	57.53	96.1538	-36.87	-73.04	Concepcion, Chile		1	1	0	2007/04
JU1200	32	76.0682	55.577	-4.6	Dundonald, United Kingdom		0	0	0	2007-08-01	T. Page
JU1212	33.84	98.5612	48.71	-3.81	Primel Tregastel, France		0	0	0	2007-09-24	M-A. Felix
JU1213	11.32	33.9899	48.71	-3.81	Primel Tregastel, France		0	1	0	2007-09-24	M-A. Felix
JU1242	21.283	94.3237	49.1269	1.9595	Santeuil, France		0	1	0	2007-10-14	M-A. Felix
JU1246	21	79.5742	49.1262	1.96152	Santeuil, France		0	1	0	2007-10-14	M-A. Felix
JU1395	21.77	87	47.2199	0.04619	Saut-aux-Loups, France		0	0	0	2008-03-01	M-A. Felix
JU1400	35.43	77.1112	37.3845	-5.988	Sevilla, Spain		0	1	0	2008/03	M-A. Felix
JU1409	11.25	61.6866	37.468	-5.637	Carmona, Spain		0	1	0	2008-03-31	M-A. Felix
JU1440	27	59.5905	41.4131	2.15231	Barcelona, Spain		0	1	0	2008-06-09	M-A. Felix
JU1491	0.916	61.5741	46.63	1.06	Le Blanc, France		1	1	0	2008-08-17	M-A. Felix
JU1530	40.71	88.837	48.7015	2.1725	Orsay, France		0	1	0	2008-09-09	M-A. Felix
JU1568	50.14	89.2492	48.8092	2.3862	Ivry-sur-Seine, France		0	0	0	2008-10-05	M-A. Felix
JU1580	14.14	NA	48.7015	2.1725	Orsay, France		0	1	0	2008-10-06	M-A. Felix
JU1581	5	94.2547	48.7015	2.1725	Orsay, France		0	1	0	2008-10-23	M-A. Felix
JU1586	31.924	99.2857	46.63	1.06	Le Blanc, France		0	0	0	2008-11-03	M-A. Felix
JU1652	2.82	55.6941	-34.86	-56.19	Montevideo, Uruguay		0	1	0	2009
JU1896	8.352	65.6863	37.9997	23.7497	Athens, Greece		0	0	0	2010-01-02	M. Barkoulas
JU258	54	93.1926	32.73	-16.89	Ribeiro Frio, Madeira		0	1	0	2001/10	M-A. Felix
JU310	38.8	NA	46.63	1.06	Le Blanc, France		0	1	0	2002-08-25	M-A. Felix
JU311	18	76.0827	44.42	4.4	Merlet, France		0	0	0	2002-09-08	M-A. Felix
JU322	27.459	87.4552	44.42	4.4	Merlet, France		1	1	0	2002-09-08	M-A. Felix
JU323	NA	79.0853	44.42	4.4	Merlet, France		1	1	0	2002-09-08	M-A. Felix
JU346	28	78.209	44.42	4.4	Merlet, France		0	1	0	2002-09-08	M-A. Felix
JU360	39	94.4805	48.98	2.23	Franconville, France		0	1	0	2002-09-02	C. Pieau
JU363	32.83	99.359	48.98	2.23	Franconville, France		0	1	0	2002-09-16	C. Pieau
JU367	41.99	89.313	48.98	2.23	Franconville, France		0	0	0	2002-09-16	C. Pieau
JU393	7.96	79.9103	49.28	-0.32	Hermanville, France		0	1	0	2002/09	A. Barriere
JU394	11	74.0285	49.28	-0.32	Hermanville, France		0	0	0	2002/09	A. Barriere
JU397	37	89.2765	49.28	-0.32	Hermanville, France		0	1	0	2002/09	A. Barriere
JU406	37.79	96.0317	49.28	-0.32	Hermanville, France		0	0	0	2002-12-30	A. Barriere
JU440	60.2	44.6045	48.715	1.56	Beauch??ne, France		0	0	0	2003-09-12	D. Baille
JU561	36.9	90.8331	48.71	-3.81	Sainte-Barbe, France		0	1	0	2004-10-03	M-A. Felix
JU642	36.19	85.4773	48.84	2.5	Le Perreux-sur-Marne, France		0	1	0	2004-12-14	J-A Lepesant
JU751	26.69	100	48.84	2.5	Le Perreux-sur-Marne, France		0	1	0	2005-06-08	J-A Lepesant
JU774	20	69.3673	38.683	-9.34	Carcavelos, Portugal		0	1	0	2005-07-10	M-A. Felix
JU775	22.7	87.5	38.7175	-9.1486	Lisbon, Portugal		0	1	0	2005-07-10	M-A. Felix
JU778	39.65	86.5412	38.719	-9.1491	Lisbon, Portugal		1	1	0	2005-07-10	M-A. Felix
JU782	18.89	93.3333	38.7191	-9.1503	Lisbon, Portugal		0	1	0	2005-07-10	M-A. Felix
JU792	5.07	64.9462	43.06	0.24	Frechendets, France		0	1	0	2005-08-31	M-A. Felix
JU830	19.7	74.5485	48.52	9.05	Tubingen, Germany		0	1	0	2005-09-28	R. Hong
JU847	51	96.0784	48.46	7.461	Obernai, France		0	1	0	2005-10-03	M-A. Felix
KR314	40	97.9167	49.28	-123.13	Vancouver, Canada		1	1	0	1984/05	F. Dill
LKC34	32	98.5	-18	46	Unknown city, Madagascar		1	1	0	2005-06-17	V. Stowell
LSJ1	32	NA	51.45	-2.59	Bristol, United Kingdom		0	0	0	1951	W. Nicholas
MY1	51.51	66.0982	52.54	7.31	Lingen, Germany		1	1	0	2002/07	H. Schulenburg
MY10	12.92	97.3871	51.96	7.53	Roxel, Germany		0	1	0	2002/07	H. Schulenburg
MY16	2.51	72.7868	51.93	7.57	Mecklenbeck, Germany		0	1	0	2002/07	H. Schulenburg
MY18	17.93	73.6111	51.96	7.53	Roxel, Germany		0	1	0	2002/07	H. Schulenburg
MY23	2.1	41.1837	51.96	7.53	Roxel, Germany		1	1	0	2002/07	H. Schulenburg
N2	28.8	96.3589	51.45	-2.59	Bristol, United Kingdom		0	0	0	1951	W. Nicholas
PB303	24.24	100	NA	NA	NA	Ward's Biological Supply	0	1	0	1998-11-14	S. Baird
PB306	46.34	93.0233	NA	NA	NA	Connecticut Valley Biological Supply	1	1	0	1998-11-28	S. Baird
PS2025	37.75	92.2501	34.19	-118.13	Altadena, USA		1	1	0	Unknown	J. Demodena
PX179	39.98	94.2711	44.035	-123.058	Eugene, USA	Hendricks Park	1	0	0	2001-10-02	B. White
QX1211	25.98	98.1481	37.7502	-122.433	San Francisco, USA		1	1	0	2007-11-26	M. Rockman
QX1233	32	82.8979	37.8804	-122.284	Berkeley, USA		1	1	0	2007-11-24	M. Rockman
RC301	35.3	90.7142	47.99	7.84	Freiburg, Germany	University of Freiburg	0	1	0	1983	R. Cassada
WN2002	41.7808	66.1625	51.9753	5.69483	Wageningen, Netherlands		0	0	0	2007-11-20	J. Riksen
