# Supplementary material for: Extensive intraspecies cryptic variation in an ancient embryonic gene regulatory network
Source: eLife. 2019 Aug 15;8:e48220. doi: 10.7554/eLife.48220 (PMC6754231; doi:10.7554/eLife.48220)
Supplement: Supplementary file 2. [file elife-48220-supp2.xlsx]

## Sheet: RIL skn mom pheno
Strain	skn-1(RNAi) phenotype (%)	mom-2(RNAi) phenotype (%)
JR3493	2.30263	NA
JR3494	17.5926	NA
JR3495	32.2134	NA
JR3497	17.9641	NA
JR3498	12.8906	NA
JR3499	22.1709	NA
JR3500	23.2877	NA
JR3501	32.6733	47.6899
JR3502	9.13706	NA
JR3503	9.28882	NA
JR3504	2.4	91.9318
JR3505	2.41935	NA
JR3506	0.915751	46.3789
JR3507	19.4215	NA
JR3508	20.3125	NA
JR3509	12.9518	NA
JR3510	28.4133	NA
JR3511	34.4398	NA
JR3512	23.8806	NA
JR3513	32.8358	NA
JR3514	17.9266	NA
JR3515	4.4289	NA
JR3516	5.6	83.5507
JR3517	14.6245	NA
JR3519	9.35484	NA
JR3520	15.5894	82.0233
JR3521	13.2	NA
JR3522	10.5919	NA
JR3524	12.963	NA
JR3525	39.7059	NA
JR3526	8.61619	NA
JR3527	12.64	NA
JR3528	9.48276	NA
JR3529	28.1167	66.3475
JR3530	28.0967	NA
JR3531	15.8996	NA
JR3532	34.981	38.6815
JR3533	26.555	NA
JR3534	24.1681	NA
JR3535	29.2135	49.7727
JR3536	12.1107	NA
JR3537	4.41176	88.7844
JR3538	10.124	NA
JR3539	15.2249	NA
JR3540	10.4513	NA
JR3541	11.8705	NA
JR3542	26.7123	49.3802
JR3543	22.9299	NA
JR3544	1.20482	41.5373
JR3545	22.3602	49.4469
JR3546	25.816	53.6706
JR3547	28.5088	NA
JR3548	20.5556	NA
JR3549	39.5586	20.8351
JR3550	37.9691	42.7153
JR3551	20.2381	89.9052
JR3552	27.6596	NA
JR3553	24.3781	NA
JR3554	35.7778	NA
JR3555	19.8324	NA
JR3556	39.4256	NA
JR3557	16.1145	NA
JR3558	3.1746	NA
JR3559	38.6111	NA
JR3560	13.5402	53.4712
JR3561	34.2697	84.6215
JR3562	10.4348	87.8607
JR3563	1.47783	58.4065
JR3564	17.517	62.1153
JR3565	17.686	NA
JR3566	11.8534	NA
JR3567	31.0811	68.0954
JR3568	39.0805	76.2809
JR3569	7.1066	NA
JR3570	19.8502	NA
JR3571	9.90566	NA
JR3572	8	3.77273
JR3573	16.09	NA
JR3574	12.1076	NA
JR3575	42.1429	31.3636
JR3576	12.2661	60.3177
JR3577	28.1106	NA
JR3578	26.494	NA
JR3579	16.3014	NA
JR3581	30.9771	NA
JR3582	18.9573	NA
JR3583	9.84848	77.933
JR3584	32.1678	12.4247
JR3585	24	NA
JR3586	15.3203	86.0893
JR3587	19.3548	95.2665
JR3588	1.17371	NA
JR3589	31.3776	NA
JR3590	15.1181	NA
JR3597	7.08661	NA
JR3580	NA	NA
