# Supplementary figures and images for: Extensive intraspecies cryptic variation in an ancient embryonic gene regulatory network
Source: eLife journal article supplement (doi:10.7554/elife.48220), 2019-08-15

$-\log_{10}(\text{p-value})$

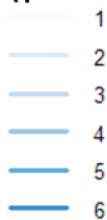

I

II

III

IV

V

X

*mom-2*(RNAi)

*skn-1*(RNAi)

Supplement: supp [file elife-48220-supp-v1.zip]

**A****Chromosome IV**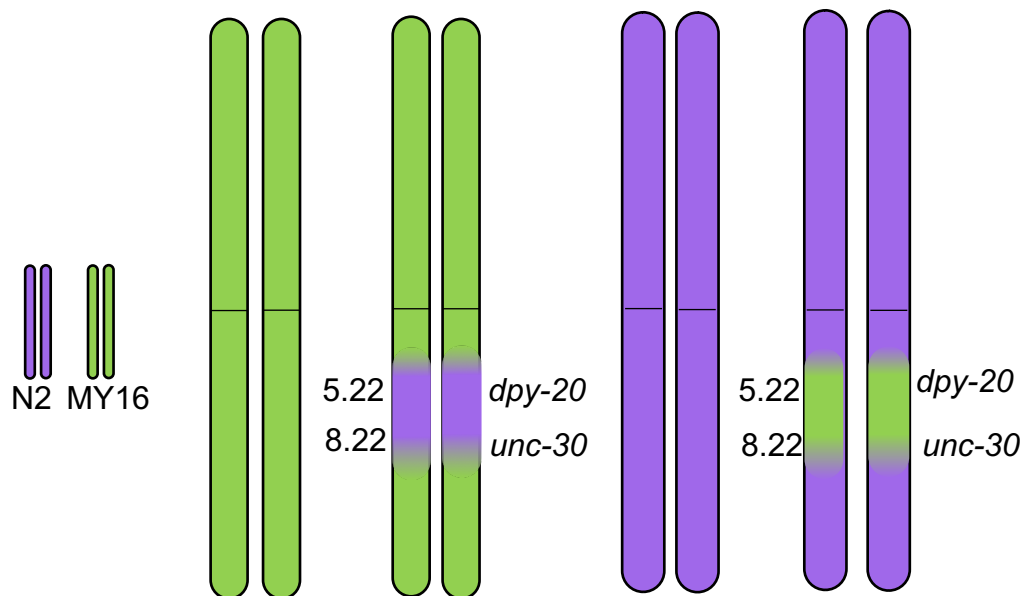**B**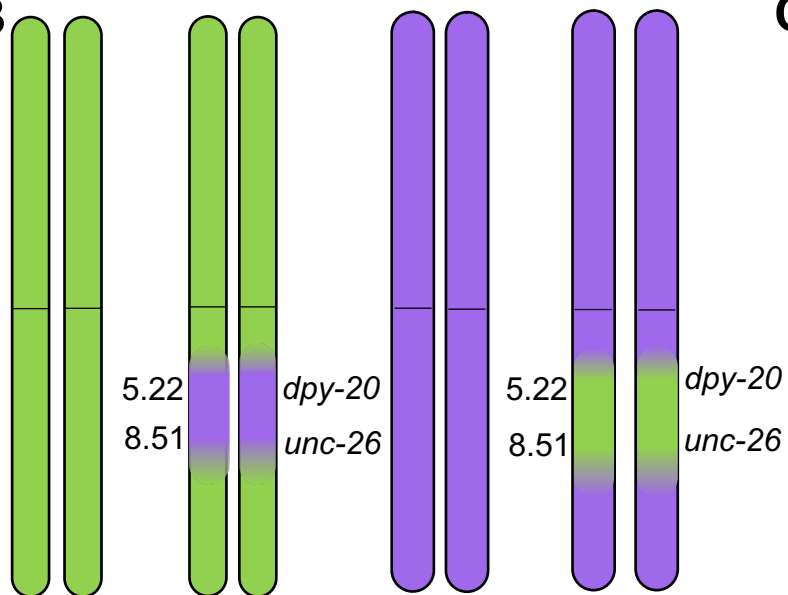**C**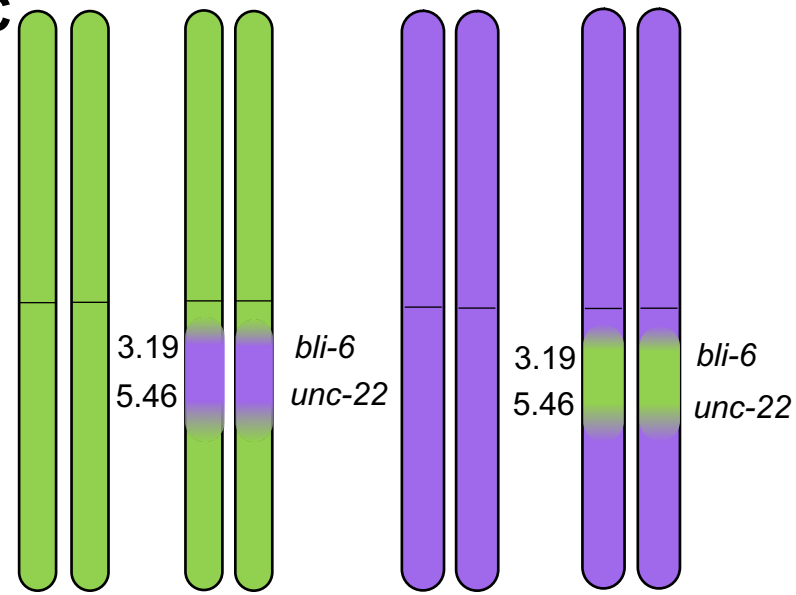

Supplement: supp [file elife-48220-supp-v1.zip]

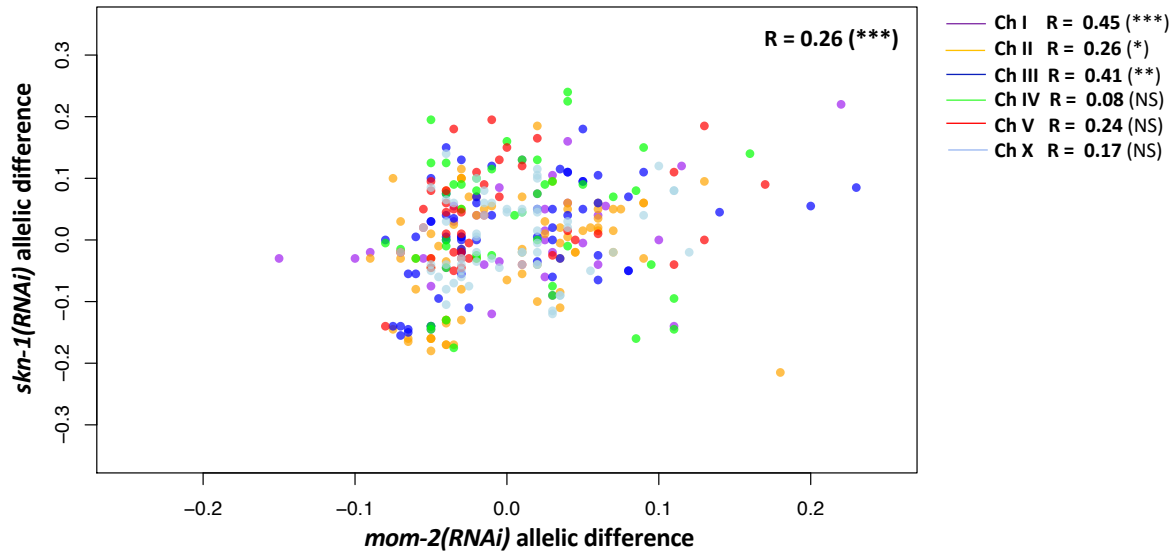

Supplement: supp [file elife-48220-supp-v1.zip]
